# Supplementary material for: In situ preparation and determination of electrochemical and electrochromic properties of copper phthalocyanine-polyaniline nanocomposite films
Source: Royal Society of Chemistry journal article supplement (doi:10.1039/c9ra06540g), 2019-01-01
Supplement: c9ra06540g1.pdf [file c9ra06540g1.pdf]

## Electronic supplementary information

### Preparation of Copper Phthalocyanine-Polyaniline Nanocomposite Films by In-situ Method and Their Electrochemical and Electrochromic Properties

Mi Ouyang,<sup>a</sup> Xuming Hu,<sup>a</sup> Xiongchao Shao,<sup>a</sup> Lu Chen,<sup>a</sup> Weijun Li,<sup>a</sup> Ru Bai,<sup>b,\*</sup> Ling Zhang,<sup>a</sup> Xiaojing Lv,<sup>a</sup> Alexey Tameev,<sup>c</sup> Cheng Zhang<sup>a,\*</sup>

*a. International Sci. & Tech. Cooperation Base of Energy Material and Application, College of Chemical Engineering, Zhejiang University of Technology, Hangzhou 310014, P. R. China; E-mail: czhang@zjut.edu.cn.*

*b. Center for Integrated Spintronics, Hangzhou Dianzi University, Hangzhou 310018, P. R. China; E-mail: bairu@hdu.edu.cn.*

*c. The Laboratory for Electronic and Photonic Processes in Polymer Nanocomposites, A. N. Frumkin Institute of Physical Chemistry and Electrochemistry of the Russian Academy of Sciences, Moscow 119071, Russia*

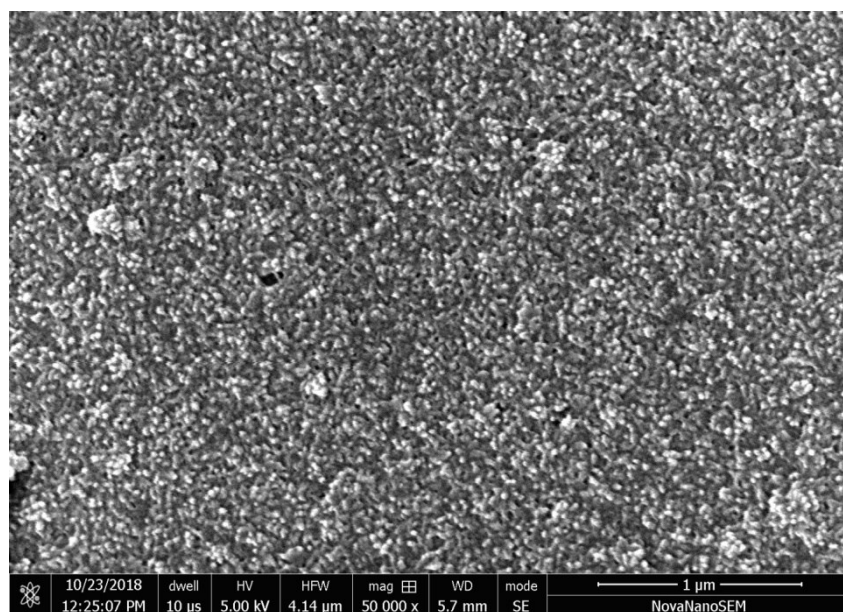

Fig. S1. SEM images of PANI film.

**Table S1. A comparison of PANI-based electrochromic films properties.**

|                         | Operation condition | $\lambda/\text{nm}$ | $T_{(\text{discoloring})}/T_{(\text{colori ng})}$ | $\Delta T\%$ | Cycle life  | Ref.      |
|-------------------------|---------------------|---------------------|---------------------------------------------------|--------------|-------------|-----------|
| Grapheme/PANI           | -0.1V~0.5V          | 700                 | 1.4s/1.4s                                         | 15.9%        | >300cycles  | 1         |
| NC/PANI                 | 0.2V~0.8V           | 665                 | 1.5s/1.0s                                         | 62.9%        | >500cycles  | 2         |
| TiO <sub>2</sub> / PANI | -0.7V~1.0V          | 700                 | 4.8s/2.2s                                         | 57.6%        | >1000cycles | 3         |
| CuPc/PANI               | -0.2V~0.7V          | 730                 | 1.96s/1.02s                                       | 58%          | >500cycles  | This work |

**References**

- (1) L. Zhao, L. Zhao, Y. X. Xu, T. F. Qiu, L. J. Zhi and G. Q. Shi, *Electrochim. Acta*, 2009, **55**, 491-497.
- (2) S. H. Zhang, G. Sun, Y. F. He, R. F. Fu, Y. C. Gu and S. Chen, *ACS Appl. Mater. Interfaces*, 2017, **9**, 16426-16434.
- (3) G. F. Cai, J. P. Tu, D. Zhou, J. H. Zhang, Q. Q. Xiong, X. Y. Zhao, X. L. Wang and C. D. Gu, *J. Phys. Chem. C*, 2013, **117**, 15967-15975.

**Table S2. A comparison of different charge amount CuPc-PANI electrochromic films properties.**

|                        | discoloring time | coloring time | optical contrast |
|------------------------|------------------|---------------|------------------|
| PANI                   | 2.9s             | 0.9s          | 56%              |
| CuPc(-0.001C)-<br>PANI | 2.04s            | 1.19s         | 47%              |
| CuPc(-0.002C)-<br>PANI | 1.96s            | 1.02s         | 58%              |
| CuPc(-0.003C)-<br>PANI | 2.7s             | 1.35s         | 49%              |
| CuPc(-0.004C)-<br>PANI | 2.72s            | 1.01s         | 46%              |

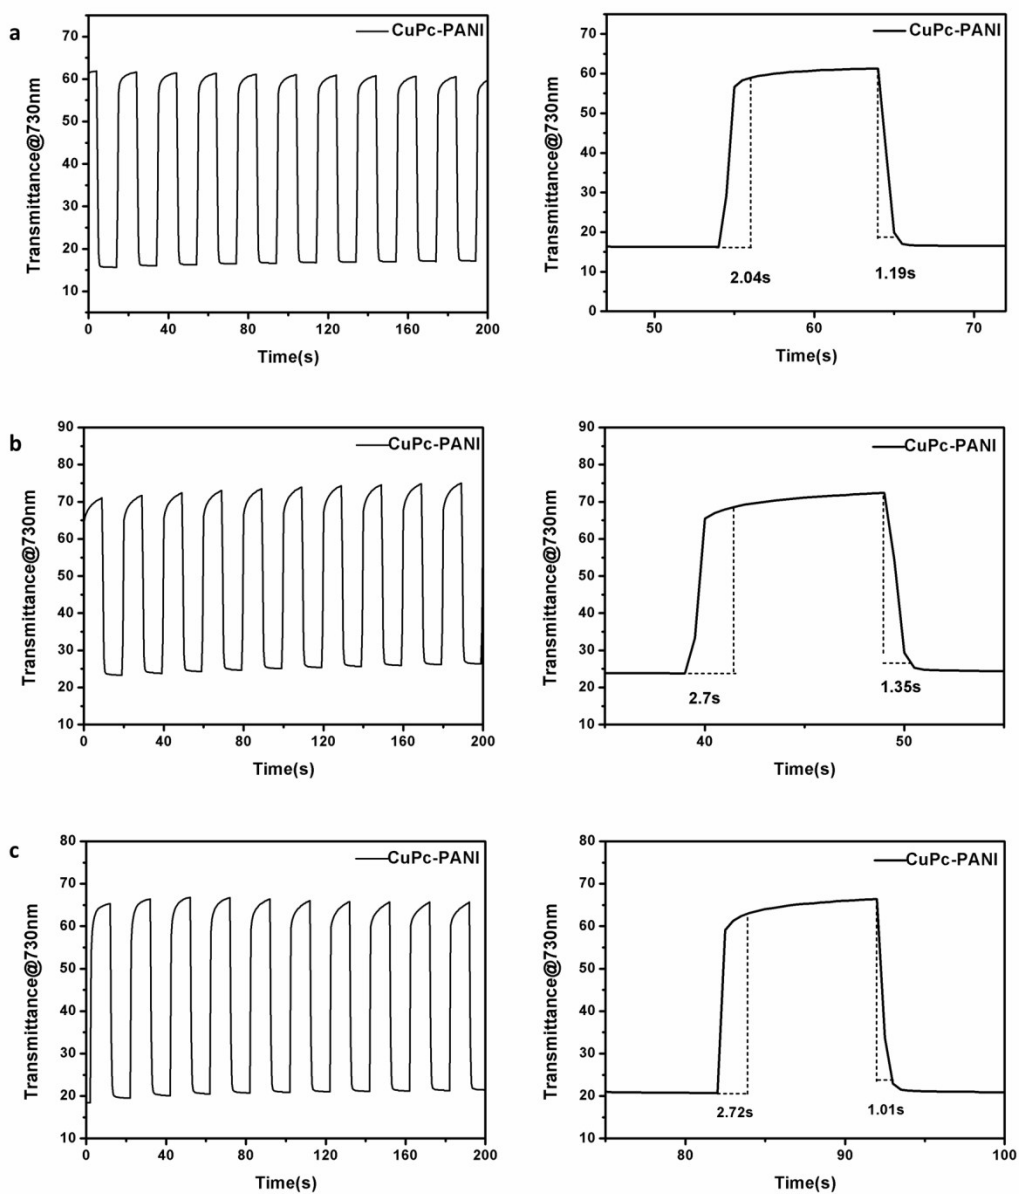

**Fig. S2. Kinetic optical transmittance (left) and Responses time (right) curves at 730 nm of CuPc (-0.001C)-PANI composite film (a), CuPc (-0.003C)-PANI composite film (b) and CuPc (-0.004C)-PANI composite film (c), switched between  $-0.2$  and  $0.7$  V for 10s at each step in 1 M H<sub>2</sub>SO<sub>4</sub> aqueous solution. Kinetic optical transmittance and Responses time curves at 730 nm of CuPc (-0.002C)-PANI as shown in Fig.7 and Fig. 8 in revised manuscript.**

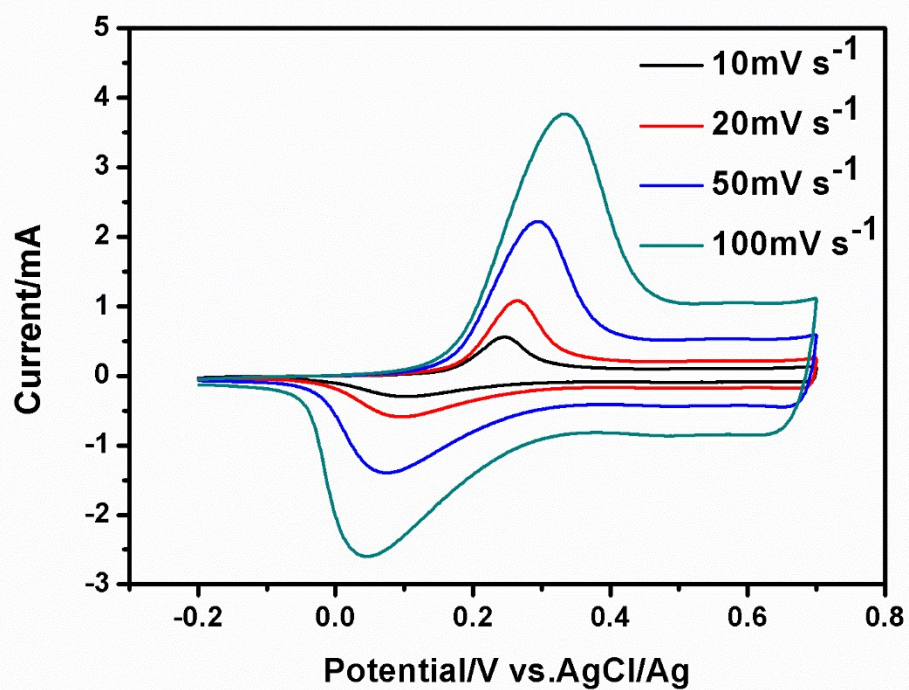

Fig. S3. Cyclic voltammetry curves of the CuPc-PANI composite film at various scan rates performed in 1 M H<sub>2</sub>SO<sub>4</sub> electrolyte.
